# Supplementary material
Source: Springer Nature journal article supplement (https://www.springermedizin.de/resource/supplementary/12893_2014_530_MOESM1_ESM.pdf/9512664)

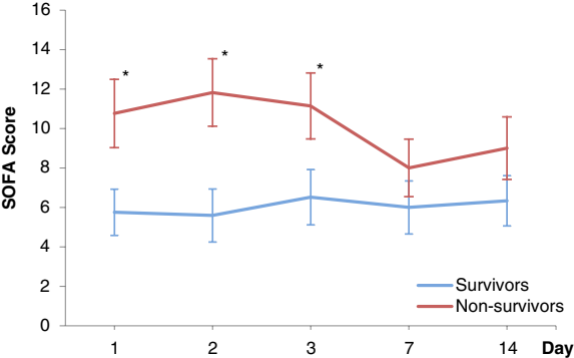

Supplement: MOESM1 [file 9512664]
